# Supplementary material for: Population-Specific Associations of Deleterious Rare Variants in Coding Region of P2RY1–P2RY12 Purinergic Receptor Genes in Large-Vessel Ischemic Stroke Patients
Source: Int J Mol Sci. 2017 Dec 11;18(12):2678. doi: 10.3390/ijms18122678 (PMC5751280; doi:10.3390/ijms18122678)
Supplement: Supplementary file 1 [file ijms-18-02678-s001.pdf]

# Population-Specific Associations of Deleterious Rare Variants in Coding Region of *P2RY1–P2RY12* Purinergic Receptor Genes in Large-Vessel Ischemic Stroke Patients

Piotr K. Janicki <sup>1</sup>, Ceren Eyileten <sup>2</sup>, Victor Ruiz-Velasco <sup>3</sup>, Khaled Anwar Sedeek <sup>3</sup>, Justyna Pordzik <sup>2</sup>, Anna Czlonkowska <sup>2,4</sup>, Iwona Kurkowska-Jastrzebska <sup>4</sup>, Shigekazu Sugino <sup>1</sup>, Yuka Imamura-Kawasawa <sup>5</sup>, Dagmara Mirowska-Guzel <sup>2</sup> and Marek Postula <sup>1,2,\*</sup>

<sup>1</sup> Perioperative Genomics Laboratory, Penn State College of Medicine, Hershey, 17033 PA, USA; pjanicki@pennstatehealth.psu.edu (P.K.J.); ssugino@hmc.psu.edu (S.S.)

<sup>2</sup> Department of Experimental and Clinical Pharmacology, Medical University of Warsaw, Center for Preclinical Research and Technology CEPT, 02-097 Warsaw, Poland; cereneyileten@gmail.com (C.E.); j.pordzik@yahoo.co.uk (J.P.); czlonkow@ipin.edu.pl (A.C.); dmirowska@wum.edu.pl (D.M.-G.)

<sup>3</sup> Department of Anesthesiology and Perioperative Medicine, Penn State College of Medicine, Hershey, 17033 PA, USA; vruizvelasco@psu.edu (V.R.-V.); ksedeek@pennstatehealth.psu.edu (K.A.S.)

<sup>4</sup> 2nd Department of Neurology, Institute of Psychiatry and Neurology, 02-957 Warsaw, Poland; ikurkowska@ipin.edu.pl

<sup>5</sup> Genome Sciences Facility, Penn State College of Medicine, Hershey, 17033 PA, USA; imamura@hmc.psu.edu

\* Correspondence: mpostula@wum.edu.pl; Tel.: +48-221-166-160

## SUPPLEMENTAL MATERIALS

### Materials and Methods Supplement.

#### 1. Sequencing and analysis

The enriched libraries were sequenced using 101 bp paired-end mode on an Illumina HiSeq 2500 sequencer. Sequenced samples (consisting of FASTQ files) were aligned using the BWA-MEM aligner (BaseSpace Labs, Illumina, <https://basespace.illumina.com>) to a human reference genome version 19, using following tools: BWA version 0.7.13 (<https://github.com/lh3/bwa>), SAMtools version 1.3 (<https://github.com/samtools/samtools>), Picard version 2.1.1 (<https://github.com/broadinstitute/picard>). Aligned reads were recalibrated, sorted, marked for read duplication, and realigned near insertion/deletion (indels) using Genome Analysis ToolKit (GATK 3.7-0, <http://www.broadinstitute.org/gatk>). Subsequent variant calling and filtrations were performed using generated from bam files (without removal of duplicate reads, as recommended for pooled sequencing) using Galaxy platform (<https://usegalaxy.org>). Firstly, bam files were sliced using the Samtools (Galaxy version 2) by the genomic regions containing exonic targets. Secondly, the genetic variants in the genomic targets were annotated using MPileup call variants (Galaxy Version 2.1.1)

routine. The resulted pileup files were processed by VarScan2 software (Galaxy version 0.1) for the final detection of variants. After final reads assembly by VarScan software and passing quality filters the subsequent screening of sequenced exons (in vcf format) was performed against dbSNP138 using wAnnovar software [14, 15]. The output files (one for each pool) from previous step was annotated by the dbNSFP version 3.2a software (<https://sites.google.com/site/jpopgen/dbNSFP>). The dbNSFP is an integrated database of functional annotations from multiple sources for the comprehensive collection of human non-synonymous single variants polymorphisms (nsSNVs). Its current version includes a total of 83,422,341 nsSNVs and splice site SNVs (ssSNVs). It compiles prediction scores from 17 prediction algorithms. In addition, each file was analyzed by the companion dbSCSNV database, which includes all potential human SNV within splicing consensus regions (-3 to +8 at the 5' splice site and -12 to +2 at the 3' splice site), i.e. splicing consensus regions (scSNVs), and predictions for their potential of altering splicing.

#### Quality control and prioritization

Pooled sequencing, the initial quality analysis allow only variants with the quality read depth of bases with Phred score  $\geq 30$  and average per-pool sample depth of bases with Phred score  $\geq 30$  were subjected for further analysis. Low variant counts per pool ( $< 12$ ) were also filtered out. All variants were then additionally filtered using a Forward/Reverse strand balance between 10-90% (strand bias). Because of the study focus on the low frequency variants (MAF  $< 5\%$ ) all variants with MAF  $\geq 5\%$  were removed from further analysis.

#### Verification of selected variants by individual genotyping

Individual genotyping for selected markers in individual DNA samples was performed using a custom Sequenom iPLEX assay in conjunction with the Mass ARRAY platform (Sequenom Inc., La Jolla, CA, USA) Panels of SNP markers were designed using

Sequenom Assay Design 3.2 software (Sequenom Inc., La Jolla, CA, USA), similar to previously described methodology from our laboratory [9, 16, 17].

### Statistic tests and calculations

CMAT is a pooling method proposed by Zawistowski et al., that works by comparing minor allele counts (for cases and controls) against the major-allele counts (for cases and controls) [18]. The calculation of CMAT were performed using AssotesR package (0.1-10) from CRAN repository ([cran.r-project.org/package=AssotesteR](http://cran.r-project.org/package=AssotesteR)) and written by Gaston Sanchez ([gastonsanchez.com/](http://gastonsanchez.com/)) as documented at [www.rdocumentation.org/packages/AssotesteR/versions/0.1-10](http://www.rdocumentation.org/packages/AssotesteR/versions/0.1-10). CMAT test was performed only for genes or region with at least one allele containing damaging variants in either investigated group. If no damaging variants were observed in one of the cohorts (controls or ischemic stroke), the exact Fisher test was used for the statistical analysis of the difference in frequency of damaging variants between study groups.

## **2. Fluorescence-based assay for P2Y<sub>1</sub> and P2Y<sub>12</sub> receptor activation in L cells**

*Plasmid constructs:* Wild-type P2RY1, P2RY12 and GIRK4 S143T cDNA constructs (in pcDNA3.1) were kind gifts from Dr. Henry L. Puhl, Ph.D. (NIH/NIAAA). The P2RY1 C824A, P2RY1 C755A, P2RY12 G672T and P2RY12 C550A mutant constructs were prepared by Watsonbio (Houston, TX). The fidelity of the mutations for each variant was confirmed by Sanger sequencing.

*Cell culture:* For this set of experiments, we employed the mouse fibroblast line, L cells (ATCC). The cells were maintained in Dulbecco's modified Eagle's medium (DMEM) supplemented with 10% fetal bovine serum, 1% penicillin/streptomycin/glutamine and 10% non-essential amino acids.

*Membrane potential assay:* The FlexStation 3 Plate Reader (Molecular Devices) was employed to measure the fluorescence changes. The blue FLIPR membrane potential dye (Molecular Devices) was reconstituted in non-supplemented DMEM (without phenol red). Thereafter, the DMEM was aspirated from the wells and the cells were loaded with 90  $\mu$ l of dye solution and 90  $\mu$ l of DMEM (without phenol red) for at least 30 min in the cell incubator. After the cells were loaded, the plate

with the cells and plate containing MeSADP (1, 0.3 and 0.1 M) were inserted into the plate reader. Data acquisition was performed with SoftMax Pro software (Molecular Devices) in which the dye was excited at a wavelength of 530 nm and emitted at 565 nm. Fluorescence readings were acquired every 1.6 sec and MeSADP was applied to each well 20 sec after the start of the recording. The data obtained was performed in triplicate. The raw fluorescence data is plotted as the change in relative fluorescence units (RFU) before and after MeSADP application. The summary data is presented as mean ( $\pm$  SEM) % change in RFU for each concentration employed. Data and statistical analysis were performed with Prism (GraphPad software) with a p value < 0.05 considered statistically significant. The graphs and fluorescence traces were generated with Autodesk Graphic.

**Table S1.** Full list of all (common and low frequency with rare variants) known variants (dbSNP138) observed during re-sequencing of 26 genes in the study, including synonymous, nonsynonymous, non-coding and intergenic variants.

| Chr   | Position  | Ref | Alt | Locus  | Gene          | dbSNP138   | Function   |
|-------|-----------|-----|-----|--------|---------------|------------|------------|
| chr3  | 4856234   | G   | A   | exonic | <i>ITPR1</i>  | rs901854   | synonymous |
| chr19 | 55539072  | T   | G   | exonic | <i>GP6</i>    | rs892090   | synonymous |
| chr1  | 156882996 | G   | C   | exonic | <i>PEAR1</i>  | rs822441   | synonymous |
| chr1  | 156877797 | C   | A   | exonic | <i>PEAR1</i>  | rs77235035 | synonymous |
| chr3  | 4767262   | T   | C   | exonic | <i>ITPR1</i>  | rs7613447  | synonymous |
| chr11 | 63987913  | G   | A   | exonic | <i>FERMT3</i> | rs72920390 | synonymous |
| chr3  | 4856180   | T   | C   | exonic | <i>ITPR1</i>  | rs711631   | synonymous |
| chr3  | 152554357 | A   | G   | exonic | <i>P2RY1</i>  | rs701265   | synonymous |
| chr3  | 151056598 | A   | C   | exonic | <i>P2RY12</i> | rs6809699  | synonymous |
| chr3  | 151056616 | G   | A   | exonic | <i>P2RY12</i> | rs6785930  | synonymous |
| chr1  | 156878737 | T   | C   | exonic | <i>PEAR1</i>  | rs6671392  | synonymous |
| chr3  | 4817057   | T   | C   | exonic | <i>ITPR1</i>  | rs6442905  | synonymous |
| chr13 | 47469940  | G   | A   | exonic | <i>HTR2A</i>  | rs6313     | synonymous |
| chr13 | 47466622  | G   | A   | exonic | <i>HTR2A</i>  | rs6305     | synonymous |
| chr3  | 4774816   | C   | T   | exonic | <i>ITPR1</i>  | rs61757111 | synonymous |
| chr5  | 52347366  | A   | C   | exonic | <i>ITGA2</i>  | rs61737774 | synonymous |
| chr1  | 169566326 | G   | A   | exonic | <i>SELP</i>   | rs6135     | synonymous |
| chr1  | 169566308 | G   | A   | exonic | <i>SELP</i>   | rs6132     | synonymous |
| chr1  | 169586330 | C   | T   | exonic | <i>SELP</i>   | rs6129     | synonymous |
| chr1  | 169562904 | C   | T   | exonic | <i>SELP</i>   | rs6128     | synonymous |
| chr3  | 128780714 | G   | A   | exonic | <i>GP9</i>    | rs6069     | synonymous |
| chr17 | 4836973   | A   | G   | exonic | <i>GP1BA</i>  | rs6067     | synonymous |
| chr17 | 4836673   | C   | T   | exonic | <i>GP1BA</i>  | rs6066     | synonymous |
| chr7  | 80292449  | G   | A   | exonic | <i>CD36</i>   | rs5956     | synonymous |
| chr17 | 45364540  | T   | C   | exonic | <i>ITGB3</i>  | rs5919     | synonymous |
| chr17 | 42452054  | C   | T   | exonic | <i>ITGA2B</i> | rs5913     | synonymous |
| chr17 | 42457120  | C   | T   | exonic | <i>ITGA2B</i> | rs5912     | synonymous |

|       |           |   |   |        |               |             |            |
|-------|-----------|---|---|--------|---------------|-------------|------------|
| chr17 | 42449789  | G | A | exonic | <i>ITGA2B</i> | rs5910      | synonymous |
| chr19 | 3600198   | C | T | exonic | <i>TBXA2R</i> | rs5748      | synonymous |
| chr19 | 3600390   | G | A | exonic | <i>TBXA2R</i> | rs5745      | synonymous |
| chr1  | 156884584 | C | T | exonic | <i>PEAR1</i>  | rs56260937  | synonymous |
| chr1  | 156883242 | G | A | exonic | <i>PEAR1</i>  | rs55864969  | synonymous |
| chr12 | 6954875   | C | T | exonic | <i>GNB3</i>   | rs5443      | synonymous |
| chr19 | 55539049  | C | T | exonic | <i>GP6</i>    | rs5030705   | synonymous |
| chr17 | 45369777  | A | G | exonic | <i>ITGB3</i>  | rs4642      | synonymous |
| chr17 | 45369789  | G | A | exonic | <i>ITGB3</i>  | rs4634      | synonymous |
| chr12 | 6953100   | T | A | exonic | <i>GNB3</i>   | rs45476395  | synonymous |
| chr19 | 3595794   | A | G | exonic | <i>TBXA2R</i> | rs4523      | synonymous |
| chr17 | 4837243   | C | T | exonic | <i>GP1BA</i>  | rs41466145  | synonymous |
| chr3  | 4714841   | G | A | exonic | <i>ITPR1</i>  | rs41289636  | synonymous |
| chr11 | 63988102  | C | T | exonic | <i>FERMT3</i> | rs3802933   | synonymous |
| chr11 | 63988045  | G | A | exonic | <i>FERMT3</i> | rs3802932   | synonymous |
| chr17 | 42463481  | G | A | exonic | <i>ITGA2B</i> | rs375882355 | synonymous |
| chr1  | 156879580 | C | T | exonic | <i>PEAR1</i>  | rs3737224   | synonymous |
| chr19 | 17000676  | C | G | exonic | <i>F2RL3</i>  | rs370953951 | synonymous |
| chr5  | 52369086  | G | A | exonic | <i>ITGA2</i>  | rs3213805   | synonymous |
| chr5  | 52368472  | C | T | exonic | <i>ITGA2</i>  | rs3212583   | synonymous |
| chr5  | 52351876  | A | G | exonic | <i>ITGA2</i>  | rs3212523   | synonymous |
| chr5  | 52351437  | C | T | exonic | <i>ITGA2</i>  | rs3212521   | synonymous |
| chr5  | 52369002  | G | A | exonic | <i>ITGA2</i>  | rs3212327   | synonymous |
| chr3  | 4716811   | A | C | exonic | <i>ITPR1</i>  | rs2306877   | synonymous |
| chr3  | 4712413   | G | A | exonic | <i>ITPR1</i>  | rs2306875   | synonymous |
| chr3  | 4699936   | G | C | exonic | <i>ITPR1</i>  | rs2306869   | synonymous |
| chr3  | 4842231   | C | T | exonic | <i>ITPR1</i>  | rs2291862   | synonymous |
| chr19 | 47124714  | T | G | exonic | <i>PTGIR</i>  | rs2229129   | synonymous |
| chr19 | 47127324  | C | G | exonic | <i>PTGIR</i>  | rs2229128   | synonymous |
| chr3  | 194118946 | C | T | exonic | <i>GP5</i>    | rs202032002 | synonymous |
| chr5  | 76029319  | G | A | exonic | <i>F2R</i>    | rs200544128 | synonymous |
| chr3  | 4836852   | G | A | exonic | <i>ITPR1</i>  | rs200426774 | synonymous |
| chr3  | 4726848   | G | A | exonic | <i>ITPR1</i>  | rs199960483 | synonymous |
| chr10 | 112838892 | C | A | exonic | <i>ADRA2A</i> | rs1800038   | synonymous |
| chr11 | 63979162  | C | T | exonic | <i>FERMT3</i> | rs17851033  | synonymous |
| chr11 | 72946020  | C | T | exonic | <i>P2RY2</i>  | rs1783596   | synonymous |
| chr11 | 72946308  | T | A | exonic | <i>P2RY2</i>  | rs17244555  | synonymous |
| chr19 | 55525894  | G | A | exonic | <i>GP6</i>    | rs1671151   | synonymous |
| chr19 | 55538980  | T | C | exonic | <i>GP6</i>    | rs1654425   | synonymous |
| chr17 | 45368337  | A | C | exonic | <i>ITGB3</i>  | rs15908     | synonymous |
| chr5  | 52353922  | T | A | exonic | <i>ITGA2</i>  | rs149911770 | synonymous |
| chr3  | 194118763 | G | A | exonic | <i>GP5</i>    | rs149317860 | synonymous |
| chr1  | 169586363 | G | A | exonic | <i>SELP</i>   | rs147922476 | synonymous |
| chr11 | 72945513  | G | T | exonic | <i>P2RY2</i>  | rs144543190 | synonymous |
| chr5  | 76028467  | G | A | exonic | <i>F2R</i>    | rs143038729 | synonymous |
| chr22 | 19711765  | C | T | exonic | <i>GP1BB</i>  | rs142352780 | synonymous |
| chr11 | 63990865  | C | T | exonic | <i>FERMT3</i> | rs142025489 | synonymous |
| chr1  | 156883194 | G | A | exonic | <i>PEAR1</i>  | rs141857901 | synonymous |
| chr7  | 80292467  | A | T | exonic | <i>CD36</i>   | rs141680676 | synonymous |

|       |           |   |   |        |               |             |               |
|-------|-----------|---|---|--------|---------------|-------------|---------------|
| chr13 | 47409005  | G | A | exonic | <i>HTR2A</i>  | rs139888059 | synonymous    |
| chr11 | 72945666  | C | A | exonic | <i>P2RY2</i>  | rs139591958 | synonymous    |
| chr1  | 169578860 | C | T | exonic | <i>SELP</i>   | rs138017338 | synonymous    |
| chr3  | 4829732   | A | G | exonic | <i>ITPR1</i>  | rs13079522  | synonymous    |
| chr1  | 156873727 | G | A | exonic | <i>PEAR1</i>  | rs12407843  | synonymous    |
| chr3  | 194118874 | T | C | exonic | <i>GP5</i>    | rs1223989   | synonymous    |
| chr3  | 4776960   | C | T | exonic | <i>ITPR1</i>  | rs113368815 | synonymous    |
| chr19 | 3595923   | G | A | exonic | <i>TBXA2R</i> | rs1131882   | synonymous    |
| chr3  | 4558241   | G | A | exonic | <i>ITPR1</i>  | rs112944532 | synonymous    |
| chr5  | 52347369  | C | T | exonic | <i>ITGA2</i>  | rs1126643   | synonymous    |
| chr1  | 156878531 | T | C | exonic | <i>PEAR1</i>  | rs11264580  | synonymous    |
| chr3  | 152553628 | C | T | exonic | <i>P2RY1</i>  | rs1065776   | synonymous    |
| chr1  | 169581608 | G | A | exonic | <i>SELP</i>   | rs139249907 | stopgain      |
| chr1  | 156883215 | C | A | exonic | <i>PEAR1</i>  | rs822442    | nonsynonymous |
| chr19 | 17000632  | G | A | exonic | <i>F2RL3</i>  | rs773902    | nonsynonymous |
| chr17 | 42463054  | G | C | exonic | <i>ITGA2B</i> | rs76066357  | nonsynonymous |
| chr17 | 42453084  | C | T | exonic | <i>ITGA2B</i> | rs74988902  | nonsynonymous |
| chr11 | 72946279  | T | C | exonic | <i>P2RY2</i>  | rs74472890  | nonsynonymous |
| chr13 | 47409034  | G | A | exonic | <i>HTR2A</i>  | rs6314      | nonsynonymous |
| chr13 | 47470824  | C | T | exonic | <i>HTR2A</i>  | rs6312      | nonsynonymous |
| chr13 | 47409048  | G | A | exonic | <i>HTR2A</i>  | rs6308      | nonsynonymous |
| chr1  | 169580885 | C | T | exonic | <i>SELP</i>   | rs6131      | nonsynonymous |
| chr1  | 169566313 | C | T | exonic | <i>SELP</i>   | rs6127      | nonsynonymous |
| chr1  | 169582317 | C | T | exonic | <i>SELP</i>   | rs6125      | nonsynonymous |
| chr17 | 4836381   | C | T | exonic | <i>GP1BA</i>  | rs6065      | nonsynonymous |
| chr17 | 45360730  | T | C | exonic | <i>ITGB3</i>  | rs5918      | nonsynonymous |
| chr17 | 42453065  | A | C | exonic | <i>ITGA2B</i> | rs5911      | nonsynonymous |
| chr17 | 45363765  | A | G | exonic | <i>ITGB3</i>  | rs56173532  | nonsynonymous |
| chr5  | 52344487  | A | G | exonic | <i>ITGA2</i>  | rs55973669  | nonsynonymous |
| chr3  | 12641707  | C | T | exonic | <i>RAF1</i>   | rs555034652 | nonsynonymous |
| chr12 | 6954864   | G | A | exonic | <i>GNB3</i>   | rs5442      | nonsynonymous |
| chr19 | 47126849  | G | A | exonic | <i>PTGIR</i>  | rs4987262   | nonsynonymous |
| chr1  | 156882757 | C | G | exonic | <i>PEAR1</i>  | rs41299597  | nonsynonymous |
| chr3  | 4704816   | G | A | exonic | <i>ITPR1</i>  | rs41289628  | nonsynonymous |
| chr19 | 55525818  | C | T | exonic | <i>GP6</i>    | rs41275822  | nonsynonymous |
| chr3  | 128781048 | G | A | exonic | <i>GP9</i>    | rs3796130   | nonsynonymous |
| chr11 | 72946140  | G | C | exonic | <i>P2RY2</i>  | rs3741156   | nonsynonymous |
| chr3  | 4821291   | G | T | exonic | <i>ITPR1</i>  | rs373973399 | nonsynonymous |
| chr3  | 4714920   | A | G | exonic | <i>ITPR1</i>  | rs35789999  | nonsynonymous |
| chr11 | 72945341  | C | T | exonic | <i>P2RY2</i>  | rs2511241   | nonsynonymous |
| chr19 | 55527081  | C | T | exonic | <i>GP6</i>    | rs2304167   | nonsynonymous |
| chr19 | 55526373  | G | C | exonic | <i>GP6</i>    | rs2304166   | nonsynonymous |
| chr7  | 80293767  | G | T | exonic | <i>CD36</i>   | rs201715989 | nonsynonymous |
| chr19 | 17001214  | G | A | exonic | <i>F2RL3</i>  | rs201593664 | nonsynonymous |
| chr5  | 76029200  | A | G | exonic | <i>F2R</i>    | rs201571376 | nonsynonymous |
| chr3  | 4716885   | C | T | exonic | <i>ITPR1</i>  | rs201519806 | nonsynonymous |
| chr17 | 4837662   | T | C | exonic | <i>GP1BA</i>  | rs201408072 | nonsynonymous |
| chr3  | 4842276   | G | A | exonic | <i>ITPR1</i>  | rs201144431 | nonsynonymous |
| chr19 | 55525763  | A | C | exonic | <i>GP6</i>    | rs200566792 | nonsynonymous |

|       |           |   |   |          |               |             |               |
|-------|-----------|---|---|----------|---------------|-------------|---------------|
| chr17 | 42455791  | G | A | exonic   | <i>ITGA2B</i> | rs200481952 | nonsynonymous |
| chr19 | 47127439  | A | G | exonic   | <i>PTGIR</i>  | rs200213497 | nonsynonymous |
| chr19 | 3594967   | G | A | exonic   | <i>TBXA2R</i> | rs199908583 | nonsynonymous |
| chr3  | 4725441   | A | G | exonic   | <i>ITPR1</i>  | rs199698357 | nonsynonymous |
| chr19 | 55543660  | G | A | exonic   | <i>GP6</i>    | rs199588110 | nonsynonymous |
| chr19 | 55526345  | T | G | exonic   | <i>GP6</i>    | rs1671152   | nonsynonymous |
| chr19 | 55530035  | C | T | exonic   | <i>GP6</i>    | rs1654416   | nonsynonymous |
| chr19 | 55526359  | A | T | exonic   | <i>GP6</i>    | rs1654413   | nonsynonymous |
| chr11 | 72946204  | C | T | exonic   | <i>P2RY2</i>  | rs1626154   | nonsynonymous |
| chr19 | 55536595  | G | A | exonic   | <i>GP6</i>    | rs1613662   | nonsynonymous |
| chr11 | 72945434  | T | C | exonic   | <i>P2RY2</i>  | rs148391446 | nonsynonymous |
| chr17 | 45376796  | G | A | exonic   | <i>ITGB3</i>  | rs144884023 | nonsynonymous |
| chr11 | 63974995  | C | G | exonic   | <i>FERMT3</i> | rs142815441 | nonsynonymous |
| chr11 | 72945799  | A | G | exonic   | <i>P2RY2</i>  | rs141776297 | nonsynonymous |
| chr1  | 169572405 | T | A | exonic   | <i>SELP</i>   | rs139642713 | nonsynonymous |
| chr19 | 17000518  | G | A | exonic   | <i>F2RL3</i>  | rs139190744 | nonsynonymous |
| chr11 | 72946298  | C | T | exonic   | <i>P2RY2</i>  | rs138929283 | nonsynonymous |
| chr1  | 28477192  | T | C | exonic   | <i>PTAFR</i>  | rs138629813 | nonsynonymous |
| chr1  | 156883546 | A | G | exonic   | <i>PEAR1</i>  | rs12137505  | nonsynonymous |
| chr1  | 156883493 | G | A | exonic   | <i>PEAR1</i>  | rs11264581  | nonsynonymous |
| chr17 | 45360680  | C | T | intronic | <i>ITGB3</i>  | rs988684    |               |
| chr3  | 4859725   | G | A | intronic | <i>ITPR1</i>  | rs9844268   |               |
| chr17 | 42454270  | T | C | intronic | <i>ITGA2B</i> | rs850731    |               |
| chr17 | 42454463  | G | C | intronic | <i>ITGA2B</i> | rs850730    |               |
| chr17 | 4835852   | A | T | intronic | <i>GP1BA</i>  | rs81663     |               |
| chr3  | 4704907   | G | A | intronic | <i>ITPR1</i>  | rs80123990  |               |
| chr3  | 4821374   | G | A | intronic | <i>ITPR1</i>  | rs78956048  |               |
| chr11 | 63990505  | C | G | intronic | <i>FERMT3</i> | rs78324705  |               |
| chr19 | 16999897  | T | C | UTR5     | <i>F2RL3</i>  | rs773905    |               |
| chr19 | 17000131  | G | A | intronic | <i>F2RL3</i>  | rs773904    |               |
| chr19 | 17000231  | C | T | intronic | <i>F2RL3</i>  | rs773903    |               |
| chr3  | 4856285   | G | A | intronic | <i>ITPR1</i>  | rs76604555  |               |
| chr3  | 4703937   | C | T | intronic | <i>ITPR1</i>  | rs7632000   |               |
| chr3  | 4708997   | G | T | intronic | <i>ITPR1</i>  | rs7625003   |               |
| chr5  | 52285453  | G | A | intronic | <i>ITGA2</i>  | rs75823056  |               |
| chr1  | 156884365 | T | C | intronic | <i>PEAR1</i>  | rs749256    |               |
| chr20 | 44747086  | G | A | intronic | <i>CD40</i>   | rs745307    |               |
| chr1  | 169564167 | G | C | intronic | <i>SELP</i>   | rs742127    |               |
| chr1  | 156876729 | T | C | intronic | <i>PEAR1</i>  | rs735953    |               |
| chr3  | 4726947   | T | G | intronic | <i>ITPR1</i>  | rs733018    |               |
| chr1  | 169599254 | T | C | intronic | <i>SELP</i>   | rs732314    |               |
| chr17 | 42454342  | A | G | intronic | <i>ITGA2B</i> | rs71371995  |               |
| chr3  | 4703657   | T | A | intronic | <i>ITPR1</i>  | rs6801737   |               |
| chr1  | 156876221 | G | A | intronic | <i>PEAR1</i>  | rs6688349   |               |
| chr1  | 156876206 | G | A | intronic | <i>PEAR1</i>  | rs6688345   |               |
| chr1  | 156875037 | T | G | intronic | <i>PEAR1</i>  | rs6676171   |               |
| chr1  | 156876237 | C | T | intronic | <i>PEAR1</i>  | rs6664765   |               |
| chr3  | 4856993   | C | G | intronic | <i>ITPR1</i>  | rs6442911   |               |
| chr3  | 4694010   | A | C | intronic | <i>ITPR1</i>  | rs6442896   |               |

|       |           |   |   |          |               |             |  |
|-------|-----------|---|---|----------|---------------|-------------|--|
| chr3  | 4693937   | G | C | intronic | <i>ITPR1</i>  | rs6442895   |  |
| chr1  | 156883617 | G | A | intronic | <i>PEAR1</i>  | rs61813833  |  |
| chr1  | 156882950 | C | T | intronic | <i>PEAR1</i>  | rs61813832  |  |
| chr20 | 44751040  | A | G | intronic | <i>CD40</i>   | rs61760051  |  |
| chr19 | 55539308  | C | G | intronic | <i>GP6</i>    | rs61145631  |  |
| chr19 | 55539303  | C | G | intronic | <i>GP6</i>    | rs59293899  |  |
| chr1  | 156882261 | C | T | intronic | <i>PEAR1</i>  | rs57731889  |  |
| chr3  | 12641425  | T | C | intronic | <i>RAF1</i>   | rs5746223   |  |
| chr1  | 156875016 | A | T | intronic | <i>PEAR1</i>  | rs574339307 |  |
| chr3  | 4694011   | G | A | intronic | <i>ITPR1</i>  | rs56896093  |  |
| chr19 | 3595981   | G | A | intronic | <i>TBXA2R</i> | rs56321318  |  |
| chr17 | 42449695  | G | A | UTR3     | <i>ITGA2B</i> | rs56311858  |  |
| chr17 | 45331397  | G | A | intronic | <i>ITGB3</i>  | rs56221506  |  |
| chr7  | 80302798  | G | T | intronic | <i>CD36</i>   | rs56082629  |  |
| chr17 | 42462844  | G | T | intronic | <i>ITGA2B</i> | rs544596241 |  |
| chr5  | 52374512  | T | G | intronic | <i>ITGA2</i>  | rs540079113 |  |
| chr11 | 63988675  | C | T | intronic | <i>FERMT3</i> | rs537670548 |  |
| chr17 | 42455650  | C | A | intronic | <i>ITGA2B</i> | rs527980644 |  |
| chr3  | 4722956   | A | G | intronic | <i>ITPR1</i>  | rs4684438   |  |
| chr1  | 156875097 | G | A | intronic | <i>PEAR1</i>  | rs4661075   |  |
| chr1  | 156875092 | G | A | intronic | <i>PEAR1</i>  | rs4661074   |  |
| chr17 | 62406986  | G | A | intronic | <i>PECAM1</i> | rs45495798  |  |
| chr17 | 45368248  | G | A | intronic | <i>ITGB3</i>  | rs41315064  |  |
| chr3  | 4716708   | C | T | intronic | <i>ITPR1</i>  | rs41311607  |  |
| chr3  | 4808477   | G | A | intronic | <i>ITPR1</i>  | rs41308265  |  |
| chr3  | 4695661   | C | T | intronic | <i>ITPR1</i>  | rs41308220  |  |
| chr3  | 4703688   | T | A | intronic | <i>ITPR1</i>  | rs41305884  |  |
| chr3  | 4704668   | G | A | intronic | <i>ITPR1</i>  | rs41289626  |  |
| chr3  | 4687498   | T | A | intronic | <i>ITPR1</i>  | rs41289624  |  |
| chr20 | 44755376  | G | C | intronic | <i>CD40</i>   | rs41282788  |  |
| chr19 | 55543973  | C | T | intronic | <i>GP6</i>    | rs41275824  |  |
| chr1  | 156881959 | C | T | intronic | <i>PEAR1</i>  | rs41273215  |  |
| chr1  | 156879504 | A | G | intronic | <i>PEAR1</i>  | rs41273205  |  |
| chr1  | 156874421 | C | G | intronic | <i>PEAR1</i>  | rs41267433  |  |
| chr1  | 169559326 | G | A | intronic | <i>SELP</i>   | rs3917853   |  |
| chr1  | 169580717 | T | C | intronic | <i>SELP</i>   | rs3917731   |  |
| chr1  | 169582401 | C | G | intronic | <i>SELP</i>   | rs3917721   |  |
| chr1  | 169588354 | G | A | intronic | <i>SELP</i>   | rs3917696   |  |
| chr5  | 52369193  | A | G | intronic | <i>ITGA2</i>  | rs3815755   |  |
| chr7  | 80302196  | G | A | intronic | <i>CD36</i>   | rs3807075   |  |
| chr17 | 42463176  | G | A | intronic | <i>ITGA2B</i> | rs377288289 |  |
| chr20 | 44757407  | G | A | intronic | <i>CD40</i>   | rs3765459   |  |
| chr20 | 44757213  | A | G | intronic | <i>CD40</i>   | rs3765457   |  |
| chr17 | 45380002  | T | C | intronic | <i>ITGB3</i>  | rs3760372   |  |
| chr11 | 63979074  | C | T | intronic | <i>FERMT3</i> | rs376021574 |  |
| chr3  | 4738774   | A | G | intronic | <i>ITPR1</i>  | rs3749382   |  |
| chr3  | 4768756   | A | G | intronic | <i>ITPR1</i>  | rs373579234 |  |
| chr17 | 42455953  | G | A | intronic | <i>ITGA2B</i> | rs370496752 |  |
| chr5  | 52369122  | A | G | intronic | <i>ITGA2</i>  | rs369350934 |  |

|       |           |   |   |          |               |             |  |
|-------|-----------|---|---|----------|---------------|-------------|--|
| chr3  | 12641345  | T | C | intronic | <i>RAF1</i>   | rs369196677 |  |
| chr5  | 52382703  | T | C | intronic | <i>ITGA2</i>  | rs3212698   |  |
| chr5  | 52382748  | A | T | intronic | <i>ITGA2</i>  | rs3212635   |  |
| chr5  | 52370174  | G | A | intronic | <i>ITGA2</i>  | rs3212591   |  |
| chr5  | 52368594  | C | T | intronic | <i>ITGA2</i>  | rs3212586   |  |
| chr5  | 52368546  | T | C | intronic | <i>ITGA2</i>  | rs3212584   |  |
| chr5  | 52368366  | A | C | intronic | <i>ITGA2</i>  | rs3212582   |  |
| chr5  | 52367715  | T | C | intronic | <i>ITGA2</i>  | rs3212580   |  |
| chr5  | 52356692  | T | C | intronic | <i>ITGA2</i>  | rs3212538   |  |
| chr5  | 52353959  | T | C | intronic | <i>ITGA2</i>  | rs3212529   |  |
| chr5  | 52351746  | G | A | intronic | <i>ITGA2</i>  | rs3212522   |  |
| chr5  | 52337908  | C | T | intronic | <i>ITGA2</i>  | rs3212441   |  |
| chr7  | 80301218  | C | G | intronic | <i>CD36</i>   | rs3212017   |  |
| chr7  | 80295701  | T | C | intronic | <i>CD36</i>   | rs3212012   |  |
| chr7  | 80301369  | C | A | intronic | <i>CD36</i>   | rs3211942   |  |
| chr7  | 80293916  | C | T | intronic | <i>CD36</i>   | rs3211908   |  |
| chr7  | 80290369  | A | G | intronic | <i>CD36</i>   | rs3211892   |  |
| chr3  | 4562910   | G | C | intronic | <i>ITPR1</i>  | rs304015    |  |
| chr3  | 4693943   | G | A | intronic | <i>ITPR1</i>  | rs28724276  |  |
| chr3  | 4693953   | G | A | intronic | <i>ITPR1</i>  | rs28592010  |  |
| chr3  | 4693977   | G | A | intronic | <i>ITPR1</i>  | rs28562557  |  |
| chr12 | 6950403   | G | A | intronic | <i>GNB3</i>   | rs28395781  |  |
| chr17 | 62401118  | T | C | UTR3     | <i>PECAM1</i> | rs2812      |  |
| chr5  | 52322721  | G | T | intronic | <i>ITGA2</i>  | rs26678     |  |
| chr1  | 156875107 | C | A | intronic | <i>PEAR1</i>  | rs2644590   |  |
| chr3  | 12645007  | C | T | intronic | <i>RAF1</i>   | rs2596828   |  |
| chr3  | 12650482  | T | A | intronic | <i>RAF1</i>   | rs2454440   |  |
| chr3  | 4669692   | G | A | intronic | <i>ITPR1</i>  | rs2307067   |  |
| chr3  | 4725239   | G | A | intronic | <i>ITPR1</i>  | rs2306878   |  |
| chr3  | 4712710   | A | T | intronic | <i>ITPR1</i>  | rs2306876   |  |
| chr3  | 4699727   | T | C | intronic | <i>ITPR1</i>  | rs2306871   |  |
| chr3  | 4699776   | T | C | intronic | <i>ITPR1</i>  | rs2306870   |  |
| chr3  | 4699967   | C | G | intronic | <i>ITPR1</i>  | rs2306868   |  |
| chr3  | 4856650   | T | C | intronic | <i>ITPR1</i>  | rs2304820   |  |
| chr5  | 52355854  | T | C | intronic | <i>ITGA2</i>  | rs2303127   |  |
| chr5  | 52366162  | G | A | intronic | <i>ITGA2</i>  | rs2303126   |  |
| chr13 | 47466781  | T | G | intronic | <i>HTR2A</i>  | rs2296973   |  |
| chr17 | 45367681  | C | T | intronic | <i>ITGB3</i>  | rs2292864   |  |
| chr3  | 12633168  | A | G | intronic | <i>RAF1</i>   | rs2290161   |  |
| chr19 | 55543834  | C | T | intronic | <i>GP6</i>    | rs2288905   |  |
| chr5  | 52367706  | T | C | intronic | <i>ITGA2</i>  | rs2287871   |  |
| chr3  | 12641518  | A | G | intronic | <i>RAF1</i>   | rs2246390   |  |
| chr17 | 4835895   | T | C | UTR5     | <i>GP1BA</i>  | rs2243093   |  |
| chr5  | 76029372  | T | C | UTR3     | <i>F2R</i>    | rs2227800   |  |
| chr5  | 52366138  | G | A | intronic | <i>ITGA2</i>  | rs2112290   |  |
| chr17 | 62406971  | A | G | intronic | <i>PECAM1</i> | rs2070783   |  |
| chr19 | 55527233  | C | T | intronic | <i>GP6</i>    | rs2019599   |  |
| chr3  | 4741447   | G | A | intronic | <i>ITPR1</i>  | rs201483668 |  |
| chr1  | 156882188 | C | G | intronic | <i>PEAR1</i>  | rs201049430 |  |

|       |           |   |   |          |               |             |  |
|-------|-----------|---|---|----------|---------------|-------------|--|
| chr17 | 42452338  | G | A | intronic | <i>ITGA2B</i> | rs200677976 |  |
| chr1  | 156884391 | G | C | intronic | <i>PEAR1</i>  | rs200494787 |  |
| chr7  | 80299255  | C | T | intronic | <i>CD36</i>   | rs200439592 |  |
| chr5  | 52285405  | G | A | intronic | <i>ITGA2</i>  | rs200410974 |  |
| chr12 | 6950361   | C | T | intronic | <i>GNB3</i>   | rs189513536 |  |
| chr11 | 63978072  | G | A | intronic | <i>FERMT3</i> | rs188768294 |  |
| chr17 | 45376921  | C | T | intronic | <i>ITGB3</i>  | rs188471209 |  |
| chr20 | 44746982  | T | C | UTR5     | <i>CD40</i>   | rs1883832   |  |
| chr20 | 44750444  | C | T | intronic | <i>CD40</i>   | rs187683423 |  |
| chr3  | 12626792  | A | G | intronic | <i>RAF1</i>   | rs187514758 |  |
| chr5  | 76012370  | C | G | intronic | <i>F2R</i>    | rs186204177 |  |
| chr17 | 4835872   | C | T | intronic | <i>GP1BA</i>  | rs183989314 |  |
| chr3  | 4829575   | T | C | intronic | <i>ITPR1</i>  | rs17786144  |  |
| chr3  | 4725555   | G | C | intronic | <i>ITPR1</i>  | rs17710726  |  |
| chr1  | 169563062 | G | A | intronic | <i>SELP</i>   | rs17522707  |  |
| chr17 | 45367244  | G | C | intronic | <i>ITGB3</i>  | rs17218711  |  |
| chr17 | 45367669  | G | A | intronic | <i>ITGB3</i>  | rs16941829  |  |
| chr19 | 55529933  | A | G | intronic | <i>GP6</i>    | rs1671192   |  |
| chr19 | 55527189  | G | T | intronic | <i>GP6</i>    | rs1671153   |  |
| chr1  | 169564130 | T | G | intronic | <i>SELP</i>   | rs1569471   |  |
| chr1  | 156879929 | G | A | intronic | <i>PEAR1</i>  | rs149157097 |  |
| chr3  | 4767199   | G | C | intronic | <i>ITPR1</i>  | rs147708579 |  |
| chr1  | 156880288 | C | G | intronic | <i>PEAR1</i>  | rs146834392 |  |
| chr17 | 42452153  | G | A | intronic | <i>ITGA2B</i> | rs145564830 |  |
| chr13 | 47466439  | G | A | intronic | <i>HTR2A</i>  | rs145194929 |  |
| chr5  | 52285286  | G | A | UTR5     | <i>ITGA2</i>  | rs143667535 |  |
| chr11 | 63987559  | G | A | intronic | <i>FERMT3</i> | rs143587409 |  |
| chr5  | 52344610  | A | G | intronic | <i>ITGA2</i>  | rs1421933   |  |
| chr17 | 4837906   | A | G | UTR3     | <i>GP1BA</i>  | rs142179565 |  |
| chr1  | 169588501 | C | T | intronic | <i>SELP</i>   | rs142170818 |  |
| chr17 | 62406985  | C | T | intronic | <i>PECAM1</i> | rs141531322 |  |
| chr1  | 169582130 | T | G | intronic | <i>SELP</i>   | rs141161996 |  |
| chr5  | 52285389  | G | A | intronic | <i>ITGA2</i>  | rs139897689 |  |
| chr5  | 52360658  | A | T | intronic | <i>ITGA2</i>  | rs139704993 |  |
| chr11 | 63987641  | A | T | intronic | <i>FERMT3</i> | rs138055838 |  |
| chr5  | 52338083  | T | G | intronic | <i>ITGA2</i>  | rs1363192   |  |
| chr1  | 169560624 | G | A | intronic | <i>SELP</i>   | rs13306837  |  |
| chr17 | 45364619  | A | G | intronic | <i>ITGB3</i>  | rs13306478  |  |
| chr5  | 52386458  | G | A | UTR3     | <i>ITGA2</i>  | rs13173706  |  |
| chr3  | 4716672   | T | C | intronic | <i>ITPR1</i>  | rs13082052  |  |
| chr17 | 42455717  | G | A | intronic | <i>ITGA2B</i> | rs12938868  |  |
| chr19 | 47126614  | C | G | intronic | <i>PTGIR</i>  | rs12459883  |  |
| chr1  | 156874993 | C | T | intronic | <i>PEAR1</i>  | rs12048392  |  |
| chr3  | 4776784   | A | G | intronic | <i>ITPR1</i>  | rs11920001  |  |
| chr17 | 45331358  | C | G | intronic | <i>ITGB3</i>  | rs11871407  |  |
| chr17 | 45377825  | T | C | intronic | <i>ITGB3</i>  | rs11870252  |  |
| chr17 | 45378041  | C | T | intronic | <i>ITGB3</i>  | rs11867253  |  |
| chr1  | 156878887 | G | A | intronic | <i>PEAR1</i>  | rs11810027  |  |
| chr5  | 52351995  | T | A | intronic | <i>ITGA2</i>  | rs118050125 |  |

|       |           |   |   |          |               |             |  |
|-------|-----------|---|---|----------|---------------|-------------|--|
| chr1  | 156878435 | C | T | intronic | <i>PEAR1</i>  | rs11800463  |  |
| chr20 | 44751415  | A | G | intronic | <i>CD40</i>   | rs11699100  |  |
| chr20 | 44757475  | C | T | intronic | <i>CD40</i>   | rs11697349  |  |
| chr19 | 3594784   | C | T | UTR3     | <i>TBXA2R</i> | rs116937991 |  |
| chr1  | 156884399 | G | C | intronic | <i>PEAR1</i>  | rs114364739 |  |
| chr5  | 52386464  | A | C | UTR3     | <i>ITGA2</i>  | rs113222066 |  |
| chr19 | 55543448  | G | A | intronic | <i>GP6</i>    | rs111888556 |  |
| chr3  | 4562667   | T | G | intronic | <i>ITPR1</i>  | rs1038639   |  |
| chr17 | 45377712  | C | T | intronic | <i>ITGB3</i>  | rs10221263  |  |

**Table S2.** List of all indels (common and rare) observed in 26 sequenced genes in patients from both cohorts (ischemic stroke and controls) investigated in the study.

| Chr   | Start     | End       | Ref         | Alt  | dbSNP 138   | Function | Gene          | ExonicFunc           | AACChange                   |
|-------|-----------|-----------|-------------|------|-------------|----------|---------------|----------------------|-----------------------------|
| chr3  | 4669376   | 4669376   | T           | -    |             | intronic | <i>ITPR1</i>  |                      |                             |
| chr3  | 4687470   | 4687470   | -           | CT   | rs5846330   | intronic | <i>ITPR1</i>  |                      |                             |
| chr3  | 4702858   | 4702858   | -           | T    | rs11446330  | intronic | <i>ITPR1</i>  |                      |                             |
| chr3  | 4738999   | 4738999   | -           | GTGT | rs35795762  | intronic | <i>ITPR1</i>  |                      |                             |
| chr17 | 4837499   | 4837500   | TA          | -    | .           | exonic   | <i>GP1BA</i>  | frameshift deletion  | c.1600_1601del:p.Y534fs     |
| chr17 | 4837744   | 4837748   | TAATG       | -    | .           | exonic   | <i>GP1BA</i>  | frameshift deletion  | c.1845_1849del:p.P615fs     |
| chr17 | 4837744   | 4837748   | TAATG       | -    | .           | exonic   | <i>GP1BA</i>  | frameshift deletion  | c.1845_1849del:p.P615fs     |
| chr17 | 4837952   | 4837952   | -           | G    | rs199616811 | UTR3     | <i>GP1BA</i>  |                      |                             |
| chr3  | 4878420   | 4878420   | T/TTTTTTTTT | -    | rs201029025 | intronic | <i>ITPR1</i>  |                      |                             |
| chr12 | 6952414   | 6952416   | CCT         | -    |             | intronic | <i>GNB3</i>   |                      |                             |
| chr12 | 6955853   | 6955854   | AC          | -    |             | intronic | <i>GNB3</i>   |                      |                             |
| chr12 | 6955865   | 6955865   | -           | CACA | rs199501562 | intronic | <i>GNB3</i>   |                      |                             |
| chr17 | 42454567  | 42454567  | T           | -    | rs376710190 | intronic | <i>ITGA2B</i> |                      |                             |
| chr17 | 45364391  | 45364395  | TTTGT       | -    | rs56197296  | intronic | <i>ITGB3</i>  |                      |                             |
| chr17 | 45377702  | 45377702  | -           | GCGT | rs60065475  | intronic | <i>ITGB3</i>  |                      |                             |
| chr17 | 45377712  | 45377712  | -           | GT   | rs58012849  | intronic | <i>ITGB3</i>  |                      |                             |
| chr19 | 47127512  | 47127512  | -           | G    | rs552005985 | intronic | <i>PTGIR</i>  |                      |                             |
| chr13 | 47408902  | 47408902  | -           | T    | rs58145637  | UTR3     | <i>HTR2A</i>  |                      |                             |
| chr5  | 52358762  | 52358762  | A           | -    | .           | intronic | <i>ITGA2</i>  |                      |                             |
| chr5  | 52365923  | 52365923  | -           | TT   | rs398108915 | intronic | <i>ITGA2</i>  |                      |                             |
| chr5  | 52370823  | 52370823  | T           | -    |             | intronic | <i>ITGA2</i>  |                      |                             |
| chr5  | 52374528  | 52374531  | TAAA        | -    | rs3212605   | intronic | <i>ITGA2</i>  |                      |                             |
| chr19 | 55526103  | 55526103  | -           | CAGA | rs59110861  | exonic   | <i>GP6</i>    | frameshift insertion | c.1209_1210insTCTG;p.P404fs |
| chr19 | 55527173  | 55527174  | AC          | -    |             | intronic | <i>GP6</i>    |                      |                             |
| chr11 | 63990997  | 63990997  | C           | -    | rs5792315   | UTR3     | <i>FERMT3</i> |                      |                             |
| chr1  | 156874875 | 156874875 | G           | -    | rs539280179 | intronic | <i>PEAR1</i>  |                      |                             |
| chr1  | 156874875 | 156874876 | GG          | -    | rs78436112  | intronic | <i>PEAR1</i>  |                      |                             |
| chr1  | 156877884 | 156877884 | -           | G    | rs150532135 | intronic | <i>PEAR1</i>  |                      |                             |
| chr1  | 156881961 | 156881961 | -           | C    | rs528242119 | intronic | <i>PEAR1</i>  |                      |                             |
| chr1  | 169559334 | 169559334 | T           | -    | rs3917852   | intronic | <i>SELP</i>   |                      |                             |

|      |           |           |   |    |             |          |             |                      |                         |
|------|-----------|-----------|---|----|-------------|----------|-------------|----------------------|-------------------------|
| chr1 | 169560727 | 169560727 | - | A  | rs397942211 | intronic | <i>SELP</i> |                      |                         |
| chr1 | 169580892 | 169580892 | - | TT | .           | exonic   | <i>SELP</i> | frameshift insertion | c.984_985insAA:p.A329fs |
| chr1 | 169580972 | 169580972 | - | AT | rs61535831  | intronic | <i>SELP</i> |                      |                         |
| chr1 | 169586221 | 169586221 | T | -  | .           | intronic | <i>SELP</i> |                      |                         |

**Table S3.** Demographic and clinical characteristics of the study population.

|                      | <b>Ischemic stroke</b> | <b>Control</b> | <b>P</b> |
|----------------------|------------------------|----------------|----------|
| <b>Female</b>        | 40%                    | 41%            | 0.98     |
| <b>Age</b>           | 70.5±12                | 70,00±11       | 0.99     |
| <b>Hypertension</b>  | 77.40%                 | 81.00%         | 0.07     |
| <b>Heart failure</b> | 16.60%                 | 41.60%         | <0.001*  |
| <b>CAD</b>           | 29.40%                 | 53.80%         | <0.001*  |
| <b>MI</b>            | 16.00%                 | 34.60%         | <0.001*  |
| <b>Diabetes</b>      | 19.60%                 | 56.60%         | <0.001*  |
| <b>Smokers</b>       | 38.4%                  | 37%            | 0.69     |

CAD-Coronary artery disease, MI- Myocardial infarction

\* statistically significant differences by Chi2 test or t test (for age differences)
